# Supplementary material for: Characterization of Stress Responses in a Drosophila Model of Werner Syndrome
Source: MDPI journal article supplement (doi:10.3390/biom11121868), 2021-12-12
Supplement: s1 [file s1]

## Supplementary Materials

**Table S1: Raw lifespan data for adult oxidative stress assays**

| Age     | Treatment | Genotype            | Sex | Trial # | Date     | n   | me-dian | mean |
|---------|-----------|---------------------|-----|---------|----------|-----|---------|------|
| young   | Untreated | w1118               | M   | 1       | 10/23/16 | 38  | 80      | 78.4 |
| young   | Untreated | WRNexo <sup>Δ</sup> | M   | 1       | 10/23/16 | 59  | 80      | 74.1 |
| young   | H2O2 5%   | w1118               | M   | 1       | 10/23/16 | 50  | 56      | 52.4 |
| young   | H2O2 5%   | WRNexo <sup>Δ</sup> | M   | 1       | 10/23/16 | 69  | 56      | 55.3 |
| young   | Untreated | w1118               | F   | 1       | 10/23/16 | 38  | 80      | 76.2 |
| young   | Untreated | WRNexo <sup>Δ</sup> | F   | 1       | 10/23/16 | 57  | 80      | 82.9 |
| young   | H2O2 5%   | w1118               | F   | 1       | 10/23/16 | 50  | 56      | 57.2 |
| young   | H2O2 5%   | WRNexo <sup>Δ</sup> | F   | 1       | 10/23/16 | 70  | 56      | 61.8 |
| young   | Untreated | w1118               | M   | 2       | 11/7/16  | 89  | 80      | 76.0 |
| young   | Untreated | WRNexo <sup>Δ</sup> | M   | 2       | 11/7/16  | 70  | 68      | 66.8 |
| young   | H2O2 5%   | w1118               | M   | 2       | 11/7/16  | 97  | 44      | 46.6 |
| young   | H2O2 5%   | WRNexo <sup>Δ</sup> | M   | 2       | 11/7/16  | 59  | 44      | 48.5 |
| young   | Untreated | w1118               | F   | 2       | 11/7/16  | 98  | 80      | 82.2 |
| young   | Untreated | WRNexo <sup>Δ</sup> | F   | 2       | 11/7/16  | 70  | 80      | 76.5 |
| young   | H2O2 5%   | w1118               | F   | 2       | 11/7/16  | 96  | 56      | 49.9 |
| young   | H2O2 5%   | WRNexo <sup>Δ</sup> | F   | 2       | 11/7/16  | 60  | 56      | 56.6 |
| young   | Untreated | WRNexo <sup>Δ</sup> | M   | 3       | 5/15/17  | 99  | 80      | 72.5 |
| young   | H2O2 5%   | WRNexo <sup>Δ</sup> | M   | 3       | 5/15/17  | 106 | 56      | 49.8 |
| young   | Untreated | WRNexo <sup>Δ</sup> | F   | 3       | 5/15/17  | 130 | 80      | 76.0 |
| young   | H2O2 5%   | WRNexo <sup>Δ</sup> | F   | 3       | 5/15/17  | 130 | 56      | 51.8 |
| young   | Untreated | w1118               | M   | 3       | 5/15/17  | 41  | 80      | 77.6 |
| young   | H2O2 5%   | w1118               | M   | 3       | 5/15/17  | 30  | 68      | 65.0 |
| young   | Untreated | w1118               | F   | 3       | 5/15/17  | 51  | 92      | 90.3 |
| young   | H2O2 5%   | w1118               | F   | 3       | 5/15/17  | 50  | 68      | 58.4 |
| 2 weeks | Untreated | WRNexo <sup>Δ</sup> | F   | 1       | 12/2/16  | 89  | 56      | 58.6 |
| 2 weeks | H2O2 5%   | WRNexo <sup>Δ</sup> | F   | 1       | 12/2/16  | 86  | 44      | 43.3 |
| 2 weeks | Untreated | w1118               | F   | 1       | 12/2/16  | 108 | 68      | 63.0 |
| 2 weeks | H2O2 5%   | w1118               | F   | 1       | 12/2/16  | 110 | 56      | 54.5 |
| 2 weeks | Untreated | WRNexo <sup>Δ</sup> | F   | 2       | 5/17/17  | 40  | 68      | 72.1 |
| 2 weeks | H2O2 5%   | WRNexo <sup>Δ</sup> | F   | 2       | 5/17/17  | 40  | 56      | 58.6 |
| 2 weeks | Untreated | w1118               | F   | 2       | 5/17/17  | 20  | 80      | 75.5 |
| 2 weeks | H2O2 5%   | w1118               | F   | 2       | 5/17/17  | 30  | 68      | 65.0 |
| 2 weeks | Untreated | WRNexo <sup>Δ</sup> | F   | 3       | 12/11/16 | 80  | 50      | 49.6 |
| 2 weeks | H2O2 5%   | WRNexo <sup>Δ</sup> | F   | 3       | 12/11/16 | 79  | 44      | 45.1 |
| 2 weeks | Untreated | w1118               | F   | 3       | 12/11/16 | 50  | 44      | 47.7 |
| 2 weeks | H2O2 5%   | w1118               | F   | 3       | 12/11/16 | 50  | 44      | 39.4 |

|         |           |                     |   |   |          |     |    |      |
|---------|-----------|---------------------|---|---|----------|-----|----|------|
| 2 weeks | Untreated | WRNexo <sup>Δ</sup> | F | 2 | 5/17/17  | 40  | 68 | 72.1 |
| 2 weeks | H2O2 5%   | WRNexo <sup>Δ</sup> | F | 2 | 5/17/17  | 40  | 56 | 58.6 |
| 2 weeks | Untreated | w1118               | F | 2 | 5/17/17  | 20  | 80 | 75.5 |
| 2 weeks | H2O2 5%   | w1118               | F | 2 | 5/17/17  | 30  | 68 | 65.0 |
| 4 weeks | Untreated | WRNexo <sup>Δ</sup> | M | 1 | 12/6/16  | 110 | 50 | 50.0 |
| 4 weeks | H2O2 5%   | WRNexo <sup>Δ</sup> | M | 1 | 12/6/16  | 109 | 32 | 28.3 |
| 4 weeks | Untreated | WRNexo <sup>Δ</sup> | F | 1 | 12/6/16  | 117 | 56 | 57.8 |
| 4 weeks | H2O2 5%   | WRNexo <sup>Δ</sup> | F | 1 | 12/6/16  | 118 | 44 | 44.4 |
| 4 weeks | Untreated | w1118               | M | 1 | 12/6/16  | 138 | 50 | 51.0 |
| 4 weeks | H2O2 5%   | w1118               | M | 1 | 12/6/16  | 131 | 32 | 33.2 |
| 4 weeks | Untreated | w1118               | F | 1 | 12/6/16  | 119 | 56 | 58.5 |
| 4 weeks | H2O2 5%   | w1118               | F | 1 | 12/6/16  | 117 | 44 | 40.3 |
| 4 weeks | Untreated | WRNexo <sup>Δ</sup> | M | 2 | 12/11/16 | 50  | 44 | 41.8 |
| 4 weeks | H2O2 5%   | WRNexo <sup>Δ</sup> | M | 2 | 12/11/16 | 50  | 26 | 24.1 |
| 4 weeks | Untreated | WRNexo <sup>Δ</sup> | F | 2 | 12/11/16 | 40  | 44 | 43.4 |
| 4 weeks | H2O2 5%   | WRNexo <sup>Δ</sup> | F | 2 | 12/11/16 | 50  | 32 | 36.2 |
| 4 weeks | Untreated | w1118               | M | 2 | 12/11/16 | 77  | 44 | 45.1 |
| 4 weeks | H2O2 5%   | w1118               | M | 2 | 12/11/16 | 80  | 32 | 29.9 |
| 4 weeks | Untreated | w1118               | F | 2 | 12/11/16 | 40  | 44 | 45.1 |
| 4 weeks | H2O2 5%   | w1118               | F | 2 | 12/11/16 | 30  | 44 | 36.8 |
| young   | Untreated | WRNexo <sup>Δ</sup> | M | 1 | 11/7/16  | 70  | 68 | 66.8 |
| young   | 20 mM PQ  | WRNexo <sup>Δ</sup> | M | 1 | 11/7/16  | 60  | 44 | 41.0 |
| young   | Untreated | WRNexo <sup>Δ</sup> | F | 1 | 11/7/16  | 70  | 80 | 76.5 |
| young   | 20 mM PQ  | WRNexo <sup>Δ</sup> | F | 1 | 11/7/16  | 70  | 44 | 42.5 |
| young   | Untreated | w1118               | M | 1 | 11/7/16  | 89  | 80 | 76.0 |
| young   | 20 mM PQ  | w1118               | M | 1 | 11/7/16  | 100 | 32 | 37.4 |
| young   | Untreated | w1118               | F | 1 | 11/7/16  | 98  | 80 | 82.2 |
| young   | 20 mM PQ  | w1118               | F | 1 | 11/7/16  | 100 | 44 | 41.4 |
| young   | Untreated | WRNexo <sup>Δ</sup> | M | 2 | 11/1/16  | 60  | 80 | 83.4 |
| young   | 20 mM PQ  | WRNexo <sup>Δ</sup> | M | 2 | 11/1/16  | 55  | 56 | 61.3 |
| young   | Untreated | WRNexo <sup>Δ</sup> | F | 2 | 11/1/16  | 58  | 96 | 90.6 |
| young   | 20 mM PQ  | WRNexo <sup>Δ</sup> | F | 2 | 11/1/16  | 68  | 56 | 56.8 |
| young   | Untreated | w1118               | M | 2 | 11/1/16  | 60  | 96 | 95.6 |
| young   | 20 mM PQ  | w1118               | M | 2 | 11/1/16  | 59  | 56 | 59.1 |
| young   | Untreated | w1118               | F | 2 | 11/1/16  | 50  | 96 | 93.1 |
| young   | 20 mM PQ  | w1118               | F | 2 | 11/1/16  | 59  | 56 | 56.4 |

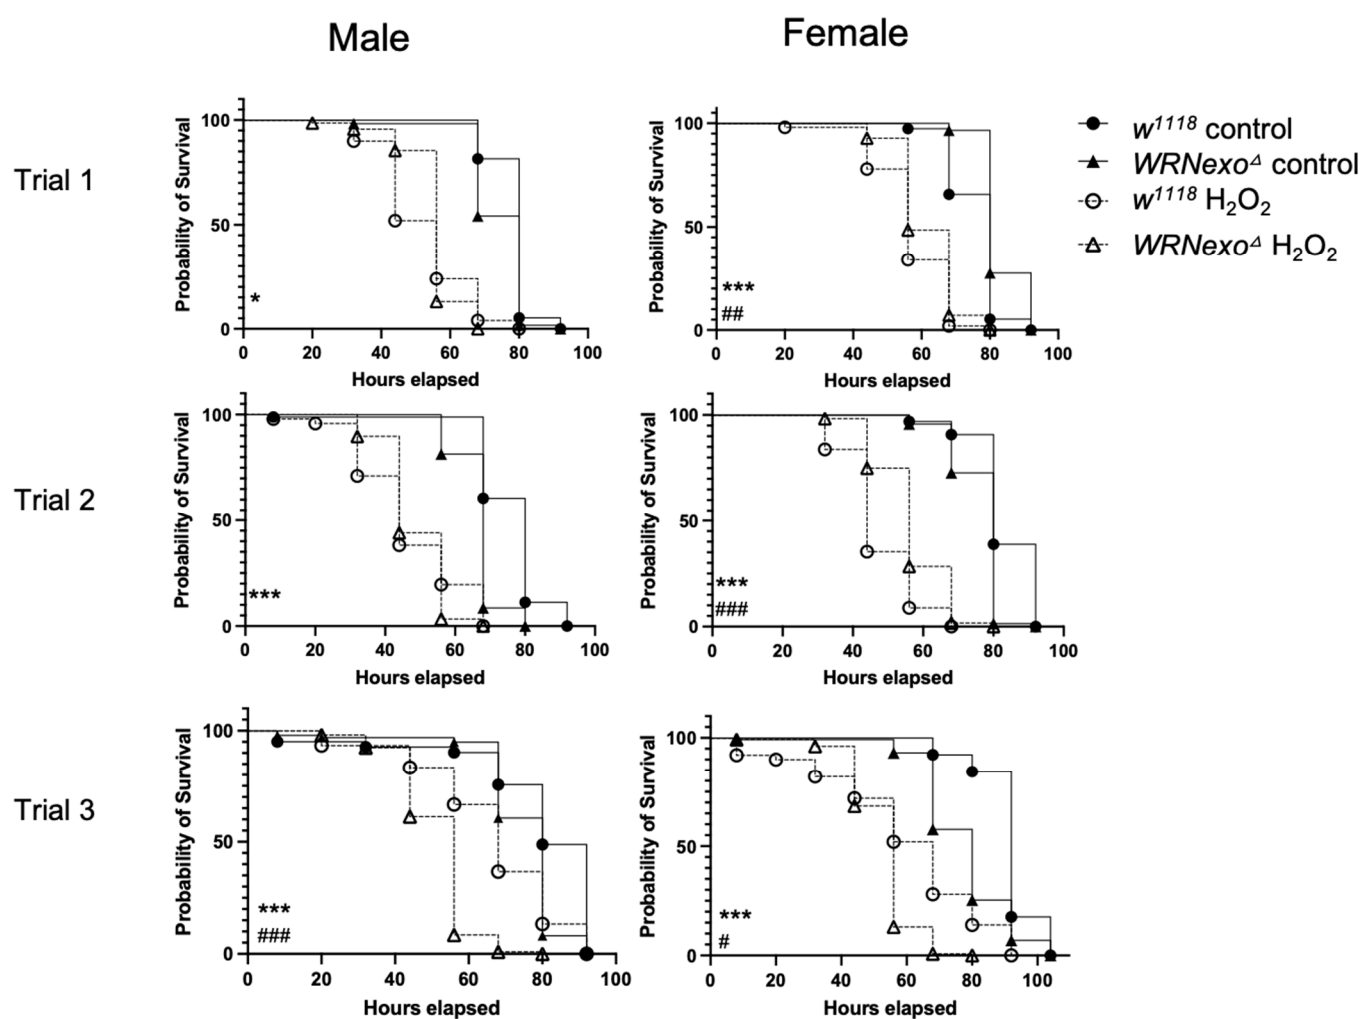

Figure S1: Kaplan-Meier survival curves for 2 day-old adult hydrogen peroxide sensitivity experiments including  $WRNexo^{\Delta}$  and  $w^{1118}$  flies. Mortality was recorded every 6–12 hours. Trial 1:  $n = 38$ –70 females and 38–69 males, Trial 2:  $n = 60$ –98 females and 59–97 males, Trial 3:  $n = 50$ –130 females and 30–100 males (Mantel-Cox log-rank between  $w^{1118}$  and  $WRNexo^{\Delta}$  controls: \* $p < 0.05$ , \*\*\* $p < 0.001$ ; Mantel-Cox log-rank between  $H_2O_2$ -treated  $w^{1118}$  and  $WRNexo^{\Delta}$ : # $p < 0.05$ , ## $p < 0.01$ , ### $p < 0.001$ ).

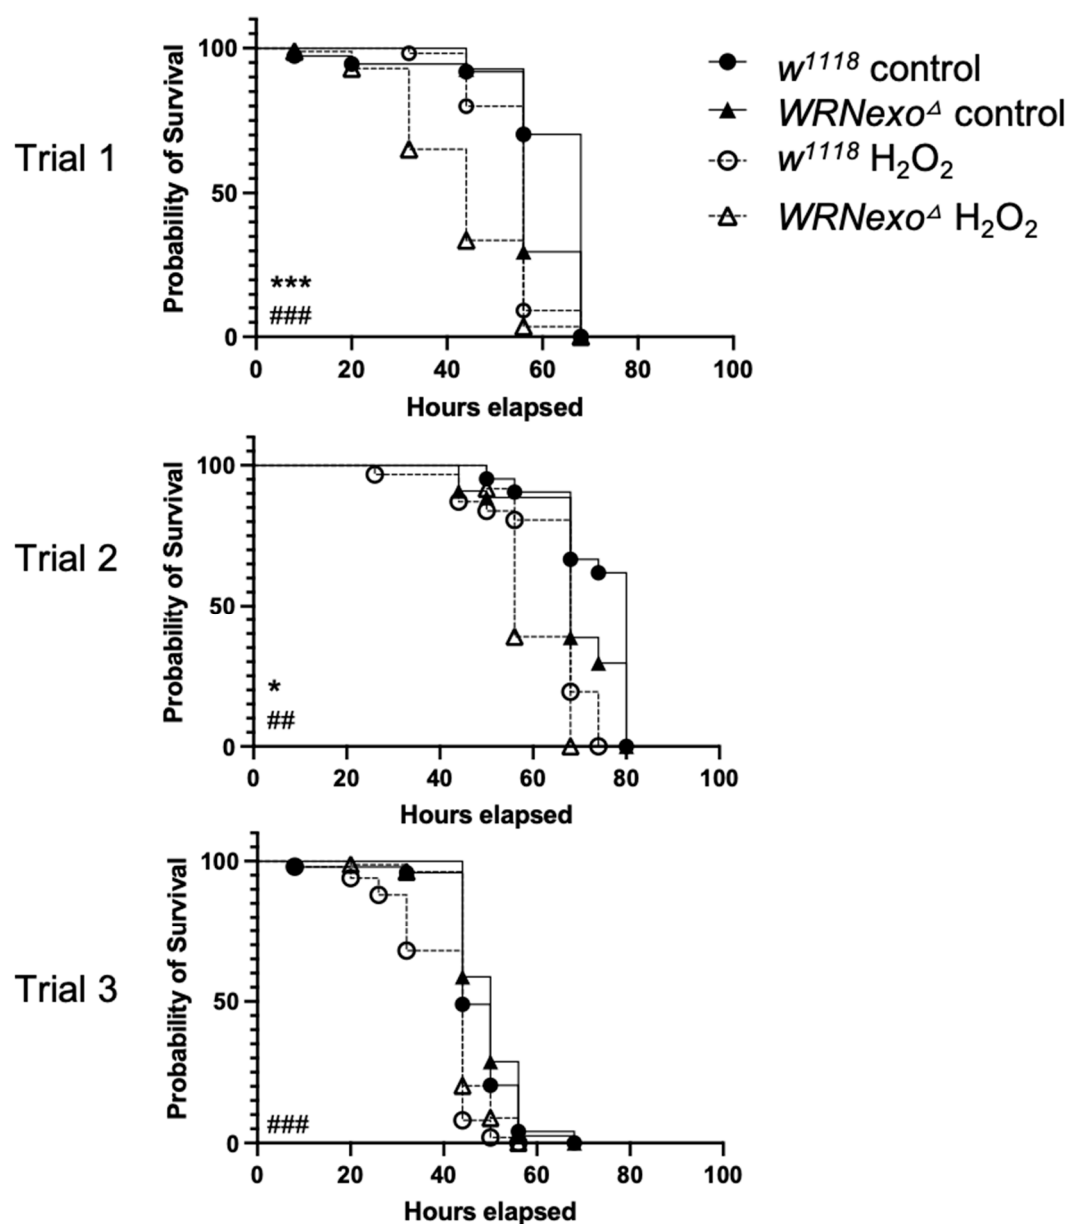

Figure S2: Kaplan-Meier survival curves for 14-day old adult female hydrogen peroxide sensitivity experiments including  $WRNexo^{\Delta}$  and  $w^{1118}$  flies. Mortality was recorded every 6-12 hours Trial 1:  $n = 84$ -111, Trial 2:  $n = 21$ -44, Trial 3:  $n = 30$ -50 (Mantel-Cox log-rank between  $w^{1118}$  and  $WRNexo^{\Delta}$  controls: \* $p < 0.05$ , \*\*\* $p < 0.001$ ; Mantel-Cox log-rank between  $H_2O_2$ -treated  $w^{1118}$  and  $WRNexo^{\Delta}$ : \*\* $p < 0.01$ , \*\*\* $p < 0.001$ ). Male sensitivity to  $H_2O_2$  was not measured.

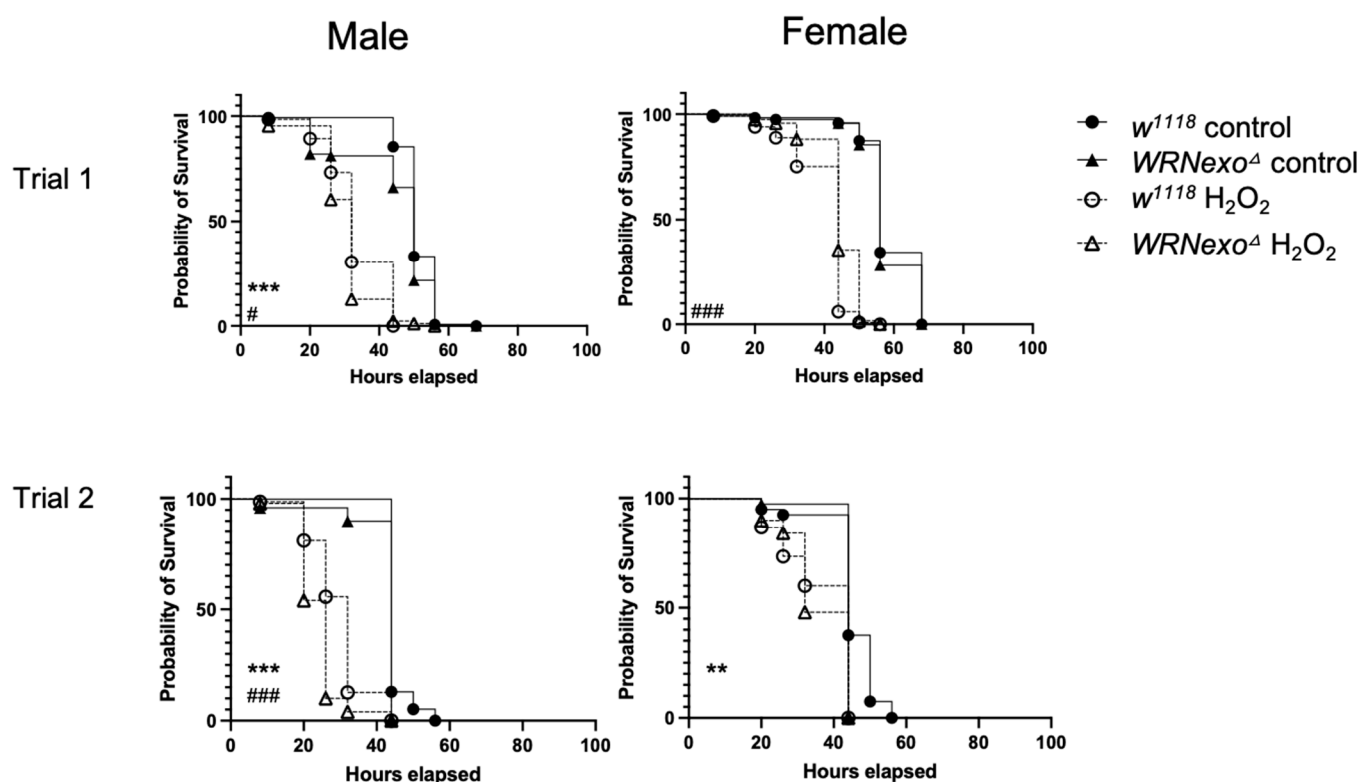

**Figure S3:** Kaplan-Meier survival curves for 28 day-old hydrogen peroxide sensitivity experiments including  $WRNexo^{\Delta}$  and  $w^{1118}$  flies. Mortality was recorded every 6–12 hours. Trial 1:  $n = 111$ – $119$  females and  $86$ – $138$  males, Trial 2:  $n = 30$ – $50$  females and  $50$ – $79$  males (Mantel-Cox log-rank between  $w^{1118}$  and  $WRNexo^{\Delta}$  controls:  $**p < 0.01$ ,  $***p < 0.001$ ; Mantel-Cox log-rank between  $H_2O_2$ -treated  $w^{1118}$  and  $WRNexo^{\Delta}$ :  $\#p < 0.05$ ,  $###p < 0.001$ ).

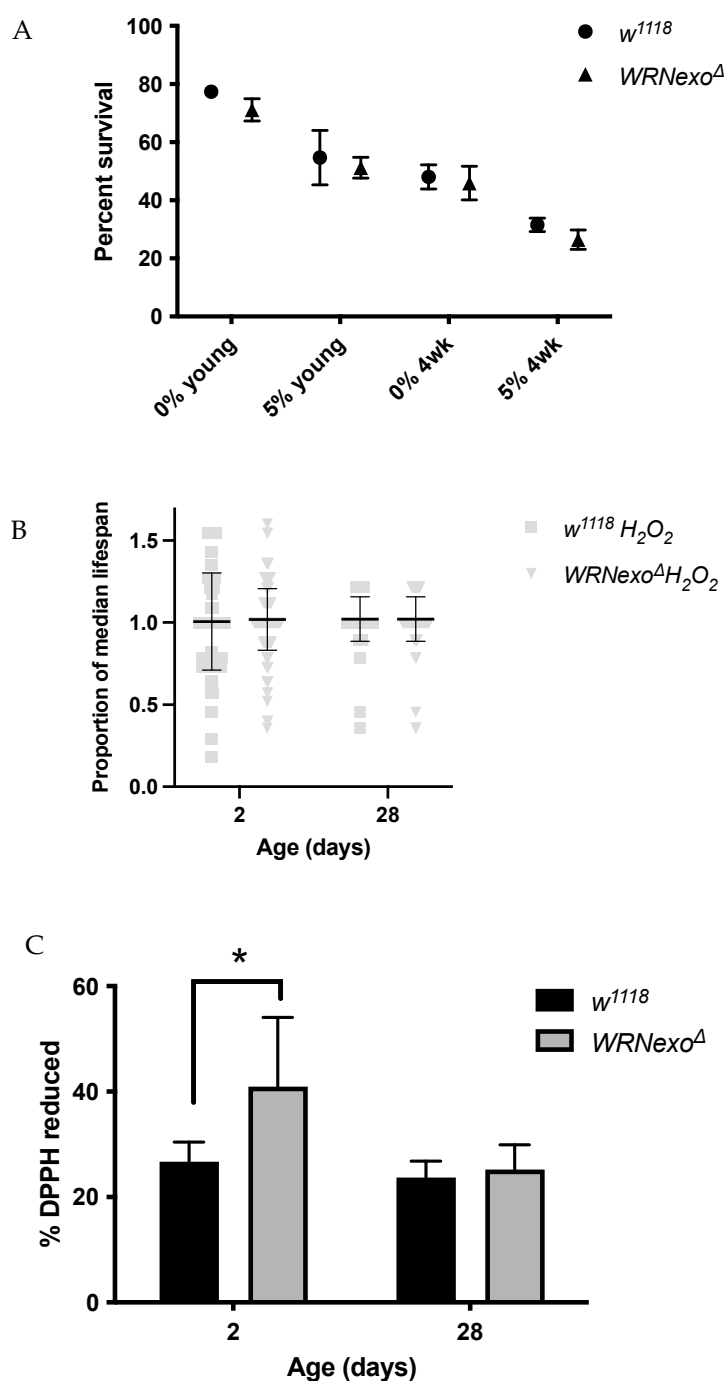

**Figure S4: Adult male *WRNexo<sup>A</sup>* are not sensitive to hydrogen peroxide at 2 and 28 days, but do show high antioxidant activity in young flies.** A) Summary data depicting mean lifespan of males exposed to hydrogen peroxide. (2-way ANOVA,  $p < 0.05$ ,  $\pm$  SEM,  $n = 2$ -3 independent experimental replicates/conditions). B) Normalized lifespans following 5% hydrogen peroxide showed resistance in *WRNexo<sup>A</sup>* males to hydrogen peroxide was similar to females (2-way ANOVA,  $*p > 0.05$ ,  $\pm$  SD,  $n = 157$ -235 males from 2-3 biological replicates). C) Crude protein extracts from young *WRNexo<sup>A</sup>* adults had the greatest neutralization effect on the stable free radical DPPH demonstrating higher antioxidant activity ( $*p < 0.05$  by paired t-test)

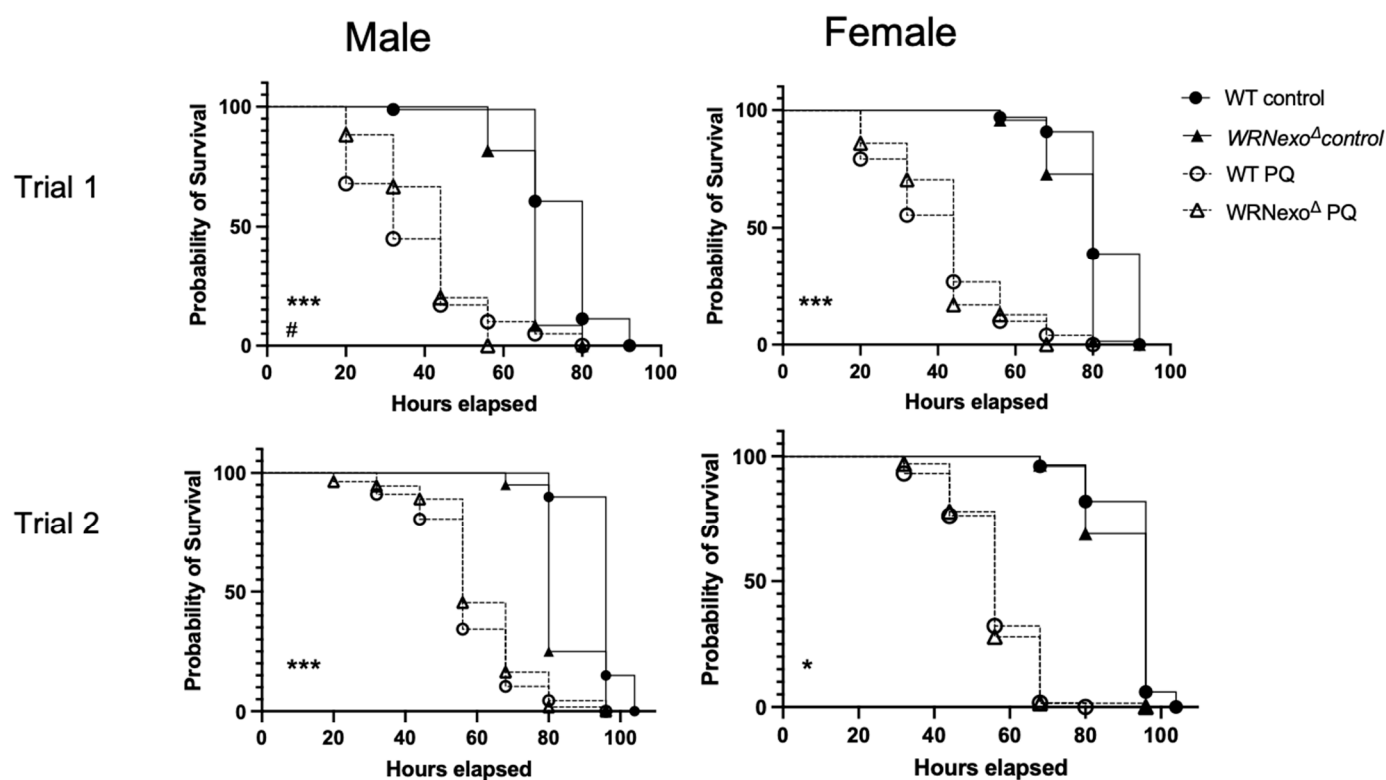

**Figure S5: Kaplan-Meier survival curves for young adult *WRNexo $\Delta$*  in response to paraquat.** Normalized lifespans following 20 mM paraquat (PQ) showed sensitivity in *WRNexo $\Delta$*  males, but no sensitivity in *WRNexo $\Delta$*  females ( $n = 2$  biological replicates containing 50–96 flies,  $\pm$  SD, Mantel-Cox log-rank between *w<sup>1118</sup>* and *WRNexo $\Delta$*  controls:  $*p < 0.05$ ,  $***p < 0.001$ ; Mantel-Cox log-rank between  $H_2O_2$ -treated *w<sup>1118</sup>* and *WRNexo $\Delta$* :  $\#p < 0.05$ ). 2-way ANOVA,  $*p < 0.05$ ,  $***p < 0.001$ ,  $****p < 0.0001$ ).

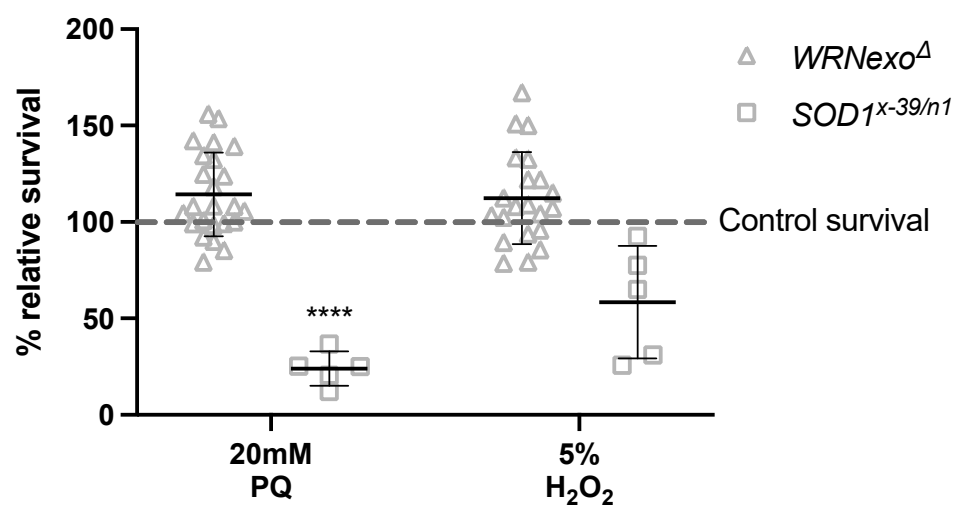

**Figure S6: Oxidative stress does not impact survival of *WRNexo*<sup>Δ</sup> larvae.** *WRNexo*<sup>Δ</sup> larvae were treated with oxidative stressors 5% hydrogen peroxide (H<sub>2</sub>O<sub>2</sub>) or 20 mM paraquat (PQ). Superoxide mutant flies (*SOD1*<sup>X-39/n1</sup>) were used as a positive control for PQ sensitivity. Adult survival was determined by dividing the percentage of treated homozygous adults by the percentage of control homozygous adults in each vial (n= 5-24 vials each containing > 20 flies). Neither of these stressors tested caused *WRNexo*<sup>Δ</sup> survival to decrease significantly from 100% survival (Student's t-test, \*\*\*\**p*<0.001, ± SD).



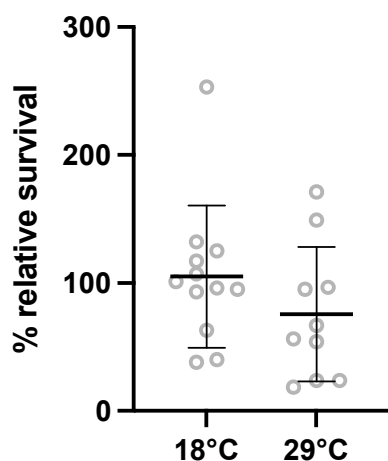

**Figure S7: Non-optimal ambient temperature does not impact survival of *WRNexo<sup>Δ</sup>* larvae.** *WRNexo<sup>Δ</sup>* larvae were treated low (18°C) and elevated (29°C) ambient temperature to induce stress. Adult survival was determined by dividing the percentage of treated adults by the percentage of control adults in each vial (n= 10-12 vials each containing > 20 flies). Non-optimal ambient temperature did not cause *WRNexo<sup>Δ</sup>* survival to decrease significantly from 100% survival (Student's t-test,  $p > 0.05$ ,  $\pm$  SD).

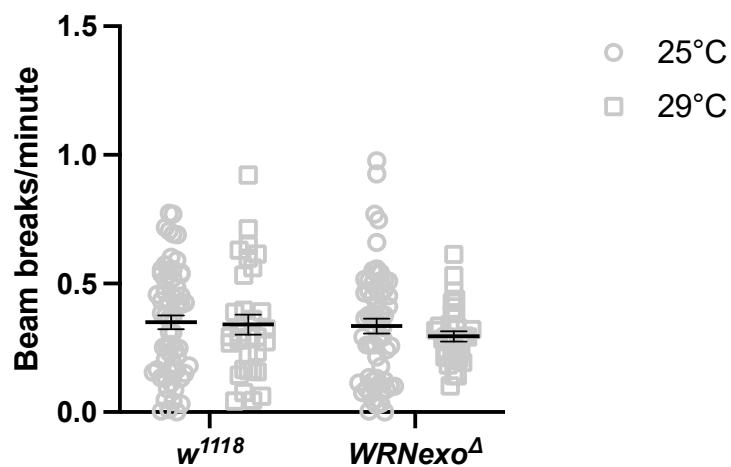

**Figure S8: Elevated ambient temperature does not impact overall activity of *WRNexo<sup>Δ</sup>* males.** Drosophila activity monitor data were collected for young (1–4 day old) *w<sup>1118</sup>* and *WRNexo<sup>Δ</sup>* males over a 6-day period. Flies were maintained at elevated ambient temperature (29°C) to induce stress. Overall *WRNexo<sup>Δ</sup>* male activity was not impacted by thermal stress (Kruskal-Wallis test,  $p > 0.05$ ).

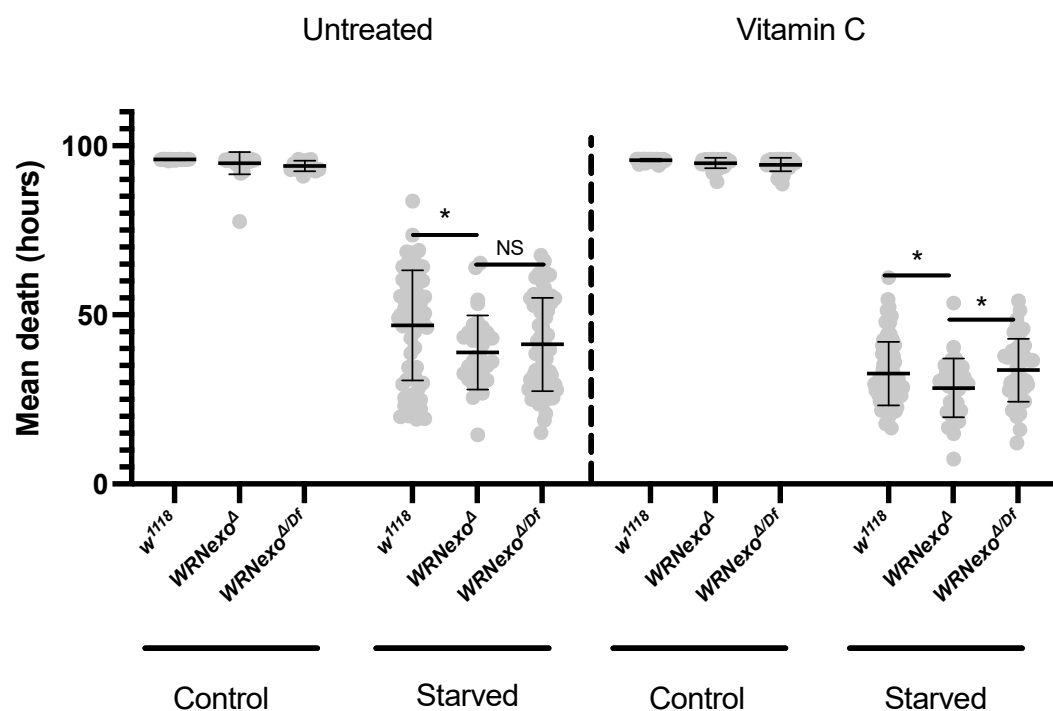

**Figure S9: *WRNexo<sup>4</sup>* males show similar starvation sensitivity as *WRNexo<sup>4</sup>* females that is not impacted by vitamin C treatment.** *WRNexo* males have shorter mean lifespans under starvation regardless of vitamin C treatment (2-way ANOVA and Tukey's multiple comparisons post-hoc test, \* $p < 0.05$ ,  $\pm$  SD,  $n = 16-80$  flies/genotype). Df = deficiency strain: *WRNexo<sup>Δ/Df509</sup>* for untreated experiments and *WRNexo<sup>Δ/Df6178</sup>* for experiments with vitamin C treatment.

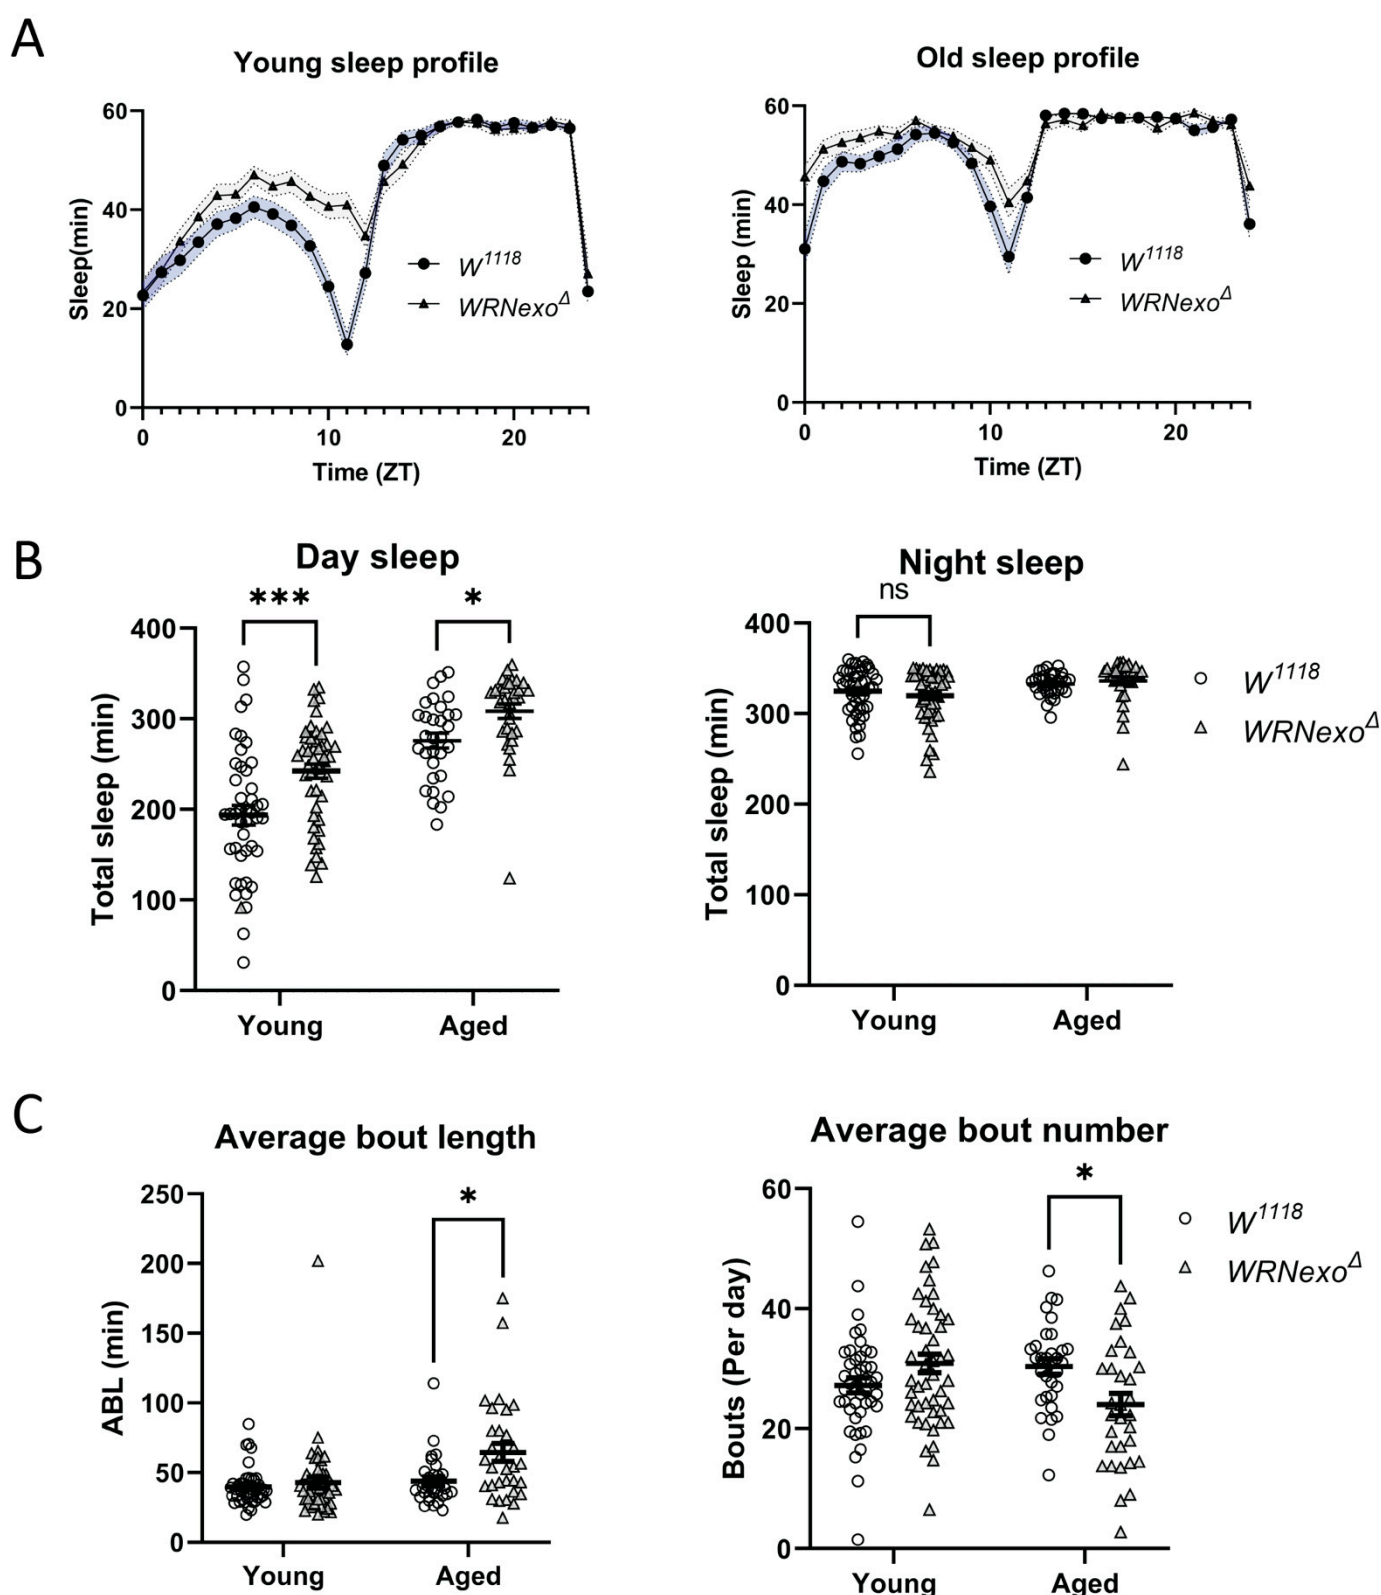

**Figure S10: Sleep profile in *WRNexo<sup>Δ</sup>* males.** A) *w<sup>1118</sup>* and *WRNexo<sup>Δ</sup>* males exhibit similar levels of sleep throughout the day regardless of age. B) *WRNexo<sup>Δ</sup>* males exhibit increased sleep during the day, but no difference in sleep at night compared to *w<sup>1118</sup>*. C) Aged *WRNexo<sup>Δ</sup>* males show fewer sleep bouts with greater length. (2-way ANOVA, \* $p < 0.05$ , \*\*\* $p < 0.001$ , \*\*\*\* $p < 0.0001$ ,  $\pm$  SEM).
